# Supplementary material for: Corneal shape changes of the total and posterior cornea after temporal versus nasal clear corneal incision cataract surgery
Source: PubMed Central journal article supplement — Br J Ophthalmol. 2018 May 18;103(2):181–5. doi: 10.1136/bjophthalmol-2017-311710 (PMC6362889; doi:10.1136/bjophthalmol-2017-311710), 2018-05-18
Supplement: bjophthalmol-2017-311710supp002.pdf [file bjophthalmol-2017-311710supp002.pdf]

**Supplementary Table 1** Number (percentage) of eyes with surgically induced astigmatism of 1.0 diopter or greater of the total cornea in eyes that underwent a 2.4-mm nasal clear corneal incision (CCI; nasal CCI group) and in eyes that underwent a 2.4-mm temporal CCI (temporal CCI group).

| <b>Time Interval</b>    | <b>Nasal CCI Group</b> | <b>Temporal CCI Group</b> | <b>p Value</b> |
|-------------------------|------------------------|---------------------------|----------------|
| 2 days postoperatively  | 15 (30.0%)             | 9 (18.0%)                 | 0.2417         |
| 2 weeks postoperatively | 12 (24.0%)             | 5 (10.0%)                 | 0.1102         |
| 4 weeks postoperatively | 9 (18.0%)              | 5 (10.0%)                 | 0.3873         |
| 8 weeks postoperatively | 5 (10.0%)              | 3 (6.0%)                  | 0.7124         |

**Supplementary Table 2** Statistical powers to detect a meaningful magnitude of difference between groups using the multivariate analysis of variance in surgically induced corneal astigmatism at each postoperative period.

---

| <b>Time Interval</b>     | <b>Total Cornea</b> | <b>Posterior Cornea</b> |
|--------------------------|---------------------|-------------------------|
| 2 days postoperatively   | 0.9269              | 1.0000                  |
| 2 weeks postoperatively  | 0.9929              | 1.0000                  |
| 1 months postoperatively | 0.9992              | 1.0000                  |
| 2 months postoperatively | 0.9742              | 1.0000                  |

---

**Supplementary Table 3** Comparison of the mean ( $\pm$  standard deviation) corrected visual acuity expressed in the logarithm of minimal angle of resolution (logMAR) scale between eyes that underwent a 2.4-mm nasal clear corneal incision (CCI; nasal CCI group) and eyes that underwent a 2.4-mm temporal CCI (temporal CCI group).

| <b>Time Interval</b>    | <b>Nasal CCI Group</b> | <b>Temporal CCI Group</b> | <b>p Value</b> |
|-------------------------|------------------------|---------------------------|----------------|
| 2 days postoperatively  | 0.04 $\pm$ 0.08        | 0.09 $\pm$ 0.13           | 0.0250*        |
| 2 weeks postoperatively | 0.00 $\pm$ 0.05        | 0.02 $\pm$ 0.09           | 0.1177         |
| 4 weeks postoperatively | -0.01 $\pm$ 0.04       | 0.13 $\pm$ 0.09           | 0.0893         |
| 8 weeks postoperatively | -0.01 $\pm$ 0.06       | 0.01 $\pm$ 0.08           | 0.2263         |

\*Statistically significant difference.

**Supplementary Table 4** Comparison of the mean ( $\pm$  standard deviation) ocular total higher-order aberrations (HOAs) between eyes that underwent a 2.4-mm nasal clear corneal incision (CCI; nasal CCI group) and eyes that underwent a 2.4-mm temporal CCI (temporal CCI group).

| <b>Time Interval</b>    | <b>Nasal CCI Group</b> | <b>Temporal CCI Group</b> | <b>p Value</b> |
|-------------------------|------------------------|---------------------------|----------------|
| 2 days postoperatively  | 0.24 $\pm$ 0.09        | 0.27 $\pm$ 0.15           | 0.2829         |
| 2 weeks postoperatively | 0.17 $\pm$ 0.06        | 0.17 $\pm$ 0.08           | 0.9297         |
| 4 weeks postoperatively | 0.18 $\pm$ 0.08        | 0.18 $\pm$ 0.12           | 0.9001         |
| 8 weeks postoperatively | 0.17 $\pm$ 0.06        | 0.15 $\pm$ 0.06           | 0.1574         |
